# Supplementary material
Source: MDPI journal article supplement (https://www.mdpi.com/2073-445X/5/3/26)
Supplement: s1 [file s1]

## Supplementary Materials

**Table S1.** Comparison of the models for taxonomic richness (TR), estimated biomass (WT) and abundance (AA). H<sub>1</sub>: X dependent on local edges; H<sub>2</sub>: X dependent on local agriculture; H<sub>3</sub>: X dependent on landscape complexity; H<sub>4</sub>: X dependent on local edge and local; agriculture; H<sub>5</sub>: X dependent on local edge and landscape complexity; H<sub>6</sub>: X dependent on local agriculture and landscape complexity; H<sub>7</sub>: Global Model; H<sub>8</sub>: X dependent on abundance (only for TR. Paper showing relationship); and H<sub>9</sub>: Null Model. Df: degrees of freedom of the model; AICc: corrected AIC;  $\Delta$ AICc: difference in AICc between the model and the model with the smallest AICc; AICcWt: model weight according to  $\Delta$ AICc; Cum. Wt: cumulative model weights; LL: Log Likelihood.

## (a) TR

| TR             | K  | AICc    | $\Delta$ AICc | AICcWt | Cum.Wt | LL       |
|----------------|----|---------|---------------|--------|--------|----------|
| H <sub>1</sub> | 20 | 5128.33 | 0.00          | 1      | 1      | −2543.68 |
| H <sub>4</sub> | 35 | 5141.39 | 13.05         | 0      | 1      | −2534.22 |
| H <sub>3</sub> | 32 | 5147.47 | 19.13         | 0      | 1      | −2540.50 |
| H <sub>2</sub> | 24 | 5149.94 | 21.61         | 0      | 1      | −2550.28 |
| H <sub>5</sub> | 46 | 5152.90 | 24.57         | 0      | 1      | −2527.89 |
| H <sub>6</sub> | 50 | 5165.54 | 37.21         | 0      | 1      | −2529.73 |
| H <sub>7</sub> | 61 | 5171.79 | 43.46         | 0      | 1      | −2520.33 |
| H <sub>8</sub> | 5  | 5178.53 | 50.20         | 0      | 1      | −2584.23 |
| H <sub>9</sub> | 3  | 5324.57 | 196.24        | 0      | 1      | −2659.27 |

## (b) WT

| WT             | K  | AICc    | $\Delta$ AICc | AICcWt | Cum.Wt | LL       |
|----------------|----|---------|---------------|--------|--------|----------|
| H <sub>1</sub> | 19 | 2928.34 | 0.00          | 1      | 1      | −1444.73 |
| H <sub>3</sub> | 31 | 2947.35 | 19.01         | 0      | 1      | −1441.52 |
| H <sub>4</sub> | 34 | 2948.13 | 19.79         | 0      | 1      | −1438.67 |
| H <sub>9</sub> | 4  | 2950.93 | 22.59         | 0      | 1      | −1471.44 |
| H <sub>5</sub> | 45 | 2956.96 | 28.62         | 0      | 1      | −1431.03 |
| H <sub>2</sub> | 23 | 2957.24 | 28.91         | 0      | 1      | −1454.98 |
| H <sub>6</sub> | 49 | 2976.58 | 48.24         | 0      | 1      | −1436.37 |
| H <sub>7</sub> | 60 | 2980.81 | 52.47         | 0      | 1      | −1425.99 |

## (c) AA

| AA             | K  | AICc    | $\Delta$ AICc | AICcWt | Cum.Wt | LL       |
|----------------|----|---------|---------------|--------|--------|----------|
| H <sub>5</sub> | 45 | 2627.05 | 0.00          | 0.89   | 0.89   | −1266.07 |
| H <sub>7</sub> | 60 | 2631.92 | 4.86          | 0.08   | 0.97   | −1251.54 |
| H <sub>3</sub> | 31 | 2634.06 | 7.00          | 0.03   | 0.99   | −1284.87 |
| H <sub>1</sub> | 19 | 2638.14 | 11.09         | 0      | 1      | −1299.64 |
| H <sub>4</sub> | 34 | 2640.16 | 13.10         | 0      | 1      | −1284.69 |
| H <sub>6</sub> | 49 | 2640.95 | 13.90         | 0      | 1      | −1268.56 |
| H <sub>9</sub> | 4  | 2645.03 | 17.97         | 0      | 1      | −1318.49 |
| H <sub>2</sub> | 23 | 2647.84 | 20.78         | 0      | 1      | −1300.28 |

**Table S2.** Models and summary tables for taxonomic diversity (TD) and biomass (WT). Variables included Location (FI or FE); average vegetation height (EdgeHt), variation in the vegetation height (EdgeSD), length of the field (Length), depth of the area between tilled area and roadway or next field (EdgeDepth), percentage of bare ground (Bareground), treatment of the edge (none, herbicide drift, mowing), and a correction factor for sample size (ln Abundance). Our random factors were method of collection (sticky board, pitfall trap, or sweep net) and field within county within year (RegionYearField).

- a)  $TD \sim (\text{FieldEdge} * (\text{EdgeHt} + \text{EdgeSD} + \text{Length} + \text{EdgeDepth} + \text{Bareground} + \text{Treatment})) + \ln(\text{Abundance}) + (1 | \text{RegionYearField}) + (1 | \text{Method})$

| Taxonomic Diversity          | Estimate  | Std. Error | z value |
|------------------------------|-----------|------------|---------|
| Intercept (FI)               | 1.21E+00  | 2.73E-01   | 4.412   |
| Location FE                  | 4.65E-02  | 1.67E-01   | 0.278   |
| EdgeHt                       | -3.89E-05 | 1.04E-03   | -0.037  |
| EdgeSD                       | 9.90E-04  | 1.35E-03   | 0.736   |
| Length                       | -3.01E-04 | 1.50E-04   | -2.001  |
| EdgeDepth                    | 2.05E-03  | 2.31E-03   | 0.887   |
| Bareground                   | 1.13E-03  | 1.75E-03   | 0.645   |
| TreatmentNone                | 2.54E-01  | 8.29E-02   | 3.062   |
| TreatmentRU                  | 1.89E-01  | 1.05E-01   | 1.804   |
| ln.Abundance                 | -1.48E-02 | 1.67E-02   | -0.888  |
| FieldEdgeField:EdgeHt        | 1.80E-03  | 1.31E-03   | 1.372   |
| FieldEdgeField:EdgeSD        | 2.74E-03  | 1.58E-03   | 1.735   |
| FieldEdgeField:Length        | 4.88E-04  | 1.78E-04   | 2.740   |
| FieldEdgeField:EdgeDepth     | -4.48E-03 | 2.92E-03   | -1.533  |
| FieldEdgeField:Bareground    | 1.15E-03  | 2.36E-03   | 0.489   |
| FieldEdgeField:TreatmentNone | -3.03E-01 | 1.06E-01   | -2.863  |
| FieldEdgeField:TreatmentRU   | -2.24E-01 | 1.45E-01   | -1.540  |

- b)  $Wt \sim (\text{FieldEdge} * (\text{EdgeHt} + \text{EdgeSD} + \text{Length} + \text{EdgeDepth} + \text{Bareground} + \text{Treatment})) + (1 | \text{RegionYearField}) + (1 | \text{Method})$

| Weight                       | Estimate  | Std. Error | z value |
|------------------------------|-----------|------------|---------|
| Intercept (FI)               | 5.77E+00  | 6.33E-01   | 9.120   |
| Location FE                  | 5.97E-02  | 3.64E-01   | 0.164   |
| EdgeHt                       | 3.68E-03  | 3.24E-03   | 1.136   |
| EdgeSD                       | -6.84E-03 | 4.65E-03   | -1.472  |
| Length                       | -7.75E-05 | 5.12E-04   | -0.151  |
| EdgeDepth                    | 6.47E-03  | 8.36E-03   | 0.773   |
| Bareground                   | 3.82E-03  | 4.78E-03   | 0.798   |
| TreatmentNone                | 3.26E-01  | 2.45E-01   | 1.331   |
| TreatmentRU                  | 4.19E-01  | 3.12E-01   | 1.342   |
| FieldEdgeField:EdgeHt        | 4.45E-04  | 2.90E-03   | 0.154   |
| FieldEdgeField:EdgeSD        | 1.35E-02  | 4.10E-03   | 3.295   |
| FieldEdgeField:Length        | 3.68E-04  | 3.97E-04   | 0.929   |
| FieldEdgeField:EdgeDepth     | -1.70E-02 | 6.49E-03   | -2.622  |
| FieldEdgeField:Bareground    | 2.82E-03  | 5.40E-03   | 0.523   |
| FieldEdgeField:TreatmentNone | -7.27E-01 | 2.32E-01   | -3.134  |
| FieldEdgeField:TreatmentRU   | -5.71E-01 | 3.25E-01   | -1.754  |

**Table S3.** Birds seen or heard during sampling; population trends and life history compiled from literature. P/M: permanent or migratory; ag: agriculture. Nest location, number of broods, feeding habits, diet, and habitat (Ehrlich 1988), residence status and trend per year over the past 50 years (Kleen 2004); trends, diet and habitat (Walk 2011).

| Species              | Latin Name                    | Trend per yr | P/M | Nest Location                      | Broods         | Feeding Habits        | Diet                                                                                                 | Habitat                                                      |
|----------------------|-------------------------------|--------------|-----|------------------------------------|----------------|-----------------------|------------------------------------------------------------------------------------------------------|--------------------------------------------------------------|
| Ring-necked pheasant | <i>Phasianus colchicus</i>    | −2.0%        | P   | ground nest                        | 1              | ground glean          | terrestrial and aquatic invertebrates, small vertebrates, seeds, grain, fruit                        | edge, ag, open country, woodlands                            |
| Northern bobwhite    | <i>Colinus virginianus</i>    | −1.9%        | P   | ground nest                        | 1              | ground glean          | leaves, fruit, tubers, spiders, snails, small vertebrates 85% veg 15% animals more insects in summer | hedgerows, tall grassland, old fields, woodlands, ag         |
| Killdeer             | <i>Charadrius vociferus</i>   | 8.1%         | M   | ground nest                        | 1              | ground glean          | 75% insects, remainder wide variety of invertebrates 2% weed seeds                                   | gravel                                                       |
| Mourning dove        | <i>Zenaidura macroura</i>     | 0.5%         | M   | usually tree 0'–40'                | multiple (2–6) | ground, foliage glean | seeds, including waste grain from cultivated fields > 99% of diet.                                   | edge, ag                                                     |
| House wren           | <i>Troglodytes aedon</i>      | 1.6%         | M   | cavity (snag) 0'–20'               | 2–3            | ground, foliage glean | insects, including millipedes, spiders, snails                                                       | open woodland, shrubland, ag                                 |
| American robin       | <i>Turdus migratorius</i>     | 2.9%         | M   | tree or shrub 10'–20'              | 2              | ground, foliage glean | insects, fruit                                                                                       | forest, woodland, gardens parks                              |
| Gray catbird         | <i>Dumetella carolinensis</i> | 0.7%         | M   | dense brush shrubland, edge 2'–10' | 2              | ground, foliage glean | insects, fruit, spiders, berries                                                                     | dense brush                                                  |
| Brown thrasher       | <i>Toxostoma rufum</i>        | −0.9%        | M   | low shrub 0'–10'                   | 2–3            | ground, foliage glean | omnivore: insects invertebrates, small vertebrates, berries, fruit                                   | dense brush, shrubland, edge                                 |
| White-eyed vireo     | <i>Vireo griseus</i>          | −1.8%        | M   | dense brush 1'–8'                  | 1–2            | foliage glean         | insects during breeding season, 20–30% berries in winter                                             | edge, ag, brushy moist areas near streams, old fields, scrub |

Table S3. Cont.

| Species              | Latin Name                   | Trend per yr | P/M | Nest Location               | Broods       | Feeding Habits               | Diet                                                                                       | Habitat                                                       |
|----------------------|------------------------------|--------------|-----|-----------------------------|--------------|------------------------------|--------------------------------------------------------------------------------------------|---------------------------------------------------------------|
| Field sparrow        | <i>Spizella pusilla</i>      | −3.0%        | M   | sapling, shrub 0–2.5'       | 2–3          | ground, foliage glean        | insects, seeds, incl few spiders, seeds of forbs and grass                                 | old fields, brush, edge, thorn scrub                          |
| Northern cardinal    | <i>Cardinalis cardinalis</i> | 0.6%         | P   | dense brush, sapling 1'–15' | multiple 2–4 | ground glean                 | insects, seeds, fruit                                                                      | dense shrubs, brush, thickets, riparian thickets              |
| Blue grosbeak        | <i>Guiraca caerulea</i>      | 1.7%         | M   | shrub 3'–12'                | 2            | ground, foliage glean        | insects, seeds, including snails, grain occasional fruit                                   | dense brush                                                   |
| Indigo bunting       | <i>Passerina cyanea</i>      | −1.0%        | M   | tree, tangle 1.5–4'         | 2–3          | foliage, ground glean        | insects, seeds, fruit, including grain, berries                                            | forest edge, woodland, old fields, shrub, orchards            |
| American goldfinch   | <i>Carduelis tristis</i>     | −0.5%        | M   | shrub, forb 2'–40'          | 1–2          | foliage, ground glean        | seeds, insects, including seeds of deciduous trees, forbs, grass, floral buds, berries     | weedy and cultivated fields, woodland, riparian edge          |
| Song sparrow         | <i>Melospiza melodia</i>     | 0.1%         | M   | shrub 0–3'                  | 2–4          | ground, foliage glean        | insects, seeds, including grass and forb seeds, some berries, crustaceans and mollusks     | early succession, dense veg riparian, forest edge             |
| Red-winged blackbird | <i>Agelaius phoeniceus</i>   | −0.3%        | M   | brush (wet), reeds          | 2–3          | ground, foliage glean, hawks | insects, seeds, spiders, grass and forb seeds, rarely fruit                                | fresh water marshes, riparian edge, fields                    |
| Eastern meadowlark   | <i>Sturnella magna</i>       | −2.3%        | M   | ground nest                 | 2            | ground glean                 | insects, seeds, spiders, grass and forb seeds, some fruit                                  | edge, ag, grassland savanna                                   |
| Brown-headed cowbird | <i>Molothrus ater</i>        | 1.1%         | M   | parasitic, shrub and ground | 1–80 eggs    | ground glean                 | insects, seeds, spiders, few snails, grain, grass and forb seeds                           | edge, ag, woodland forest edge, grassland                     |
| Dickcissel           | <i>Spiza americana</i>       | −3.5%        | M   | shrub, herbs 0–2'           | 1            | ground glean                 | insects, seeds, young birds 70% grain grass and forb seeds, 30% insects: adults is reverse | early succession, grasslands, cultivated and abandoned fields |
